# Supplementary material for: Microwave Treatment of Calcium Phosphate/Titanium Dioxide Composite to Improve Protein Adsorption
Source: MDPI journal article supplement (doi:10.3390/ma15144773), 2022-07-07
Supplement: s1 [file s1]

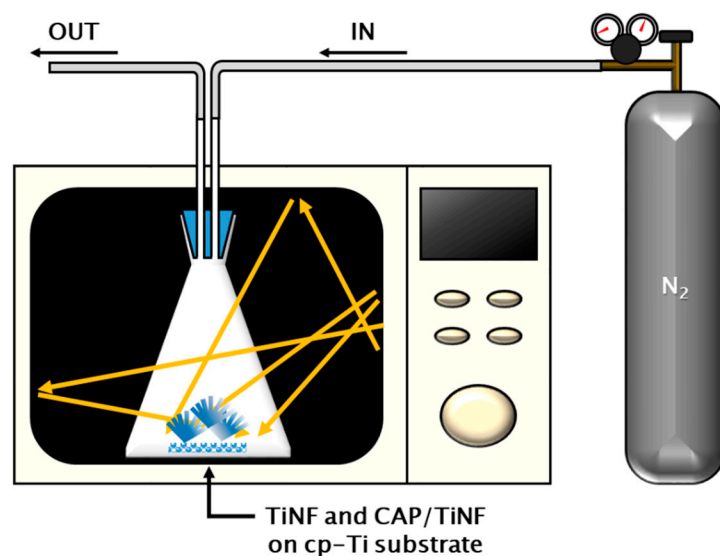

**Figure S1.** Schematic of the experimental set-up showing calcium phosphate/TiO<sub>2</sub> nanoflower sample preparation using microwave radiation.

The sample assemblies were placed in a modified commercial microwave (MW) oven (LG, ML39BW, 2.45 GHz, 700 W), and treated for 5 to 15 min under an N<sub>2</sub> atmosphere with a flow rate of 2 ml. MW oven was placed in a well-ventilated fume hood. The sample beakers were taken out and their contents were allowed to cool down to room temperature in an ambient atmosphere for the next 10–15 min.
